# Supplementary material
Source: publisher figshare collection journal article supplement (https://diabetesjournals.figshare.com/ndownloader/files/27952992)
Supplement: Supplementary file 1 [file 27952992]

## Sheet: Sheet1
Name	Sequence
Acaca F	AAGGCTATGTGAAGGATGTGG
Acaca R	CTGTCTGAAGAGGTTAGGGAAG
Acsl1 F	AGAACTGTGCAGGAACAAGG
Acsl1 R	TCAGAAGGCCGTTGTCAATAG
Acsl3 F	AGCGAGATGGAAAATGAGGTC
Acsl3 R	ACTTGAAGGCATCTGTCACC
Acsl4 F	TTGGCTACTTACCTTTGGCTC
Acsl4 R	AATCACCCTTGCTTCCCTTC
Acsl5 F	GCAGAAAATTGGGAAAGAGGG
Acsl5 R	TTTCAGTGTCGGTGTCAGAAG
Acsl6 F	TGTACCTTCACAACGCCAG
Acsl6 R	AACACATTTGGTCCTTTCACAC
Agrp F	ATGCTGACTGCAATGTTGCTG
Agrp R	TGAGGCCATTCAGACTTAGAC
Aldoa F	CCCCAAGTTATCAAGTCCAAGG
Aldoa R	GTTCAGACAGCCCATCCAG
Aldoc F	TGGTTAGGAGAGGAAGTAGAAGG
Aldoc R	CGATCCGTAGAGCAATATCCG
Avp F	CTACTTCCAGAACTGCCCAAG
Avp R	GCAGATGCTTGGTCCGAAG
Cart F	ATCTACTCTGCCGTGGATGAT
Cart R	TTCCTCACTGCGCACTGCTGT
Crh F	GATCTCACCTTCCACCTTCTG
Crh R	GCCAAGCGCAACATTTCA
Elovl1 F	GTACTTCATCCTATCGCTTGGG
Elovl1 R	GTACTCAGCCAACCAGACATC
Elovl2 F	CATCCTCACCTTGTATAACCTCG
Elovl2 R	CATCACCTTCTCCTGCACTG
Elovl4 F	GGGATCATACAACGCAGGATAC
Elovl4 R	GTCCAAATACTCAACGCCTTTC
Elovl5 F	TTTCGATGCGTCACTCAGTAC
Elovl5 R	GGTCCCAGCCATACAATGAG
Elovl6 F	GAACAAGCGAGCCAAGTTTG
Elovl6 R	TGTAAGCACCAGTTCGAAGAG
Elovl7 F	CCTGGGCCTCTATGTCTATTTTG
Elovl7 R	CCAGACATCACAAACTCATAACAC
Eno1 F	CGCCATGTCTATTCTCAGGATC
Eno1 R	AGTTCTAGGGCCTCGTAGATG
Eno2 F	TCAAGGACAAGTATGGCAAGG
Eno2 R	ACCGATCACCATCTTTTCCG
Eno3 F	CTTCATCCAGAACTATCCCGTG
Eno3 R	GAGGTCATCTCCCACAATCTG
Fasn F	CCCCTCTGTTAATTGGCTCC
Fasn R	TTGTGGAAGTGCAGGTTAGG
Fdps F	AGCCGAAGAAACAGGATGCTGAGA
Fdps R	TTCCAGAAGCAGAGCGTCGTTGAT
Gabra1 F	TGAGAGCTGAATGCCCAATG
Gabra1 R	TCTGCTACAACCACTGAACG
Gabra4 F	GCCTGCCCTTTGAAATTTGG
Gabra4 R	GATACAGTCTGCCCAATGAGG
Gabrb1 F	CCAGAGTGCCAATGAAAAGAAC
Gabrb1 R	CTGGTCTCGTTCCTGATTTCC
Gabrb2 F	CTTCCTCAGTTCTCCATCGTAG
Gabrb2 R	GTAGCCAATGTTCCTTTTCAGC
Gabrg2 F	TCTTTGTGTTTTCTGCTTTGGTG
Gabrg2 R	GGGACGAATATCAATGGTAGGG
Gabrg3 F	GAAGACTCCCCATCAAACCAG
Gabrg3 R	TCCACATCGATCACAGTTGG
Gapdh F	CAAGGTCATCCATGACAACTTTG
Gapdh R	GGCCATCCACAGTCTTCTGG
Gck F	CTTCACCTTCTCCTTCCCTG
Gck R	ATCTCAAAGTCCCCTCTCCT
Ggps1 F	GGTAAACAGGTGAGAAGCAAAC
Ggps1 R	TCGGAGCTTTGAACTGTCTTC
Glut1 F	GTTTGTTGTAGAGCGAGCTGGA
Glut1 R	ACTTCAAAGAAGGCCACAAAGC
Glut2 F	GTCACTATGCTCTGGTCTCTG
Glut2 R	CAAGAGGGCTCCAGTCAATG
Glut3 F	ACGAAATTGAGGTTGGAGGGAGGT
Glut3 R	TGACTCACAGGCCACCAGTAACAT
Glut4 F	TGATTCTGCTGCCCTTCTGT
Glut4 F	TGATTCTGCTGCCCTTCTGT
Glut4 R	GGACATTGGACGCTCTCTCT
Glut4 R	GGACATTGGACGCTCTCTCT
Grik2 F	TCCAACAGTTTCCCCAGATG
Grik2 R	CCTGTAAGACCTTCCCAATGAG
Grik3 F	CGAGAAGGTTGGAGTATGGAG
Grik3 R	CTTGCGGAACATGACAAAAGG
Grik5 F	CCCTTCTACCCAGAGTTTGTG
Grik5 R	CTTCGGTTCAGTTCTCGGAC
Grin2a F	TGGTGATCGTGCTGAATAAGG
Grin2a R	AGGTGACAATGCTGAGGTG
Grin2b F	AAGGAGAGGAAGTGGGAGAG
Grin2b R	AAGGTAACGATGCTCAGATGG
Grin2d F	CCGAAGCAACTACCCTGATATG
Grin2d R	TTTCGGGCCATGTAGTTGAG
Grm3 F	CCAAGCTCTGTGATGCAATG
Grm3 R	CCGTCTCCGTAAGTGTCAAAC
Hcrt F	TCTTGGGTATTTGGACCACTG
Hcrt R	CCCAGGGAACCTTTGTAGAAG
HK1 F	TCACATTGTCTCCTGCATCTC
HK1 R	CTTTGAATCCCTTTGTCCACG
HK3 F	ATGATCCCCGTTGTGAGATG
HK3 R	ACCCCACTCCATGTTGATG
Hmgcr F	GCCCTCAGTTCAAATTCACAG
Hmgcr R	TTCCACAAGAGCGTCAAGAG
Hmgcs1 F	TGCTGGAAAGTATACCATCGGCCT
Hmgcs1 R	GCCGCCCAATGCAATCATAGGAAA
Hsd17b7 F	CCAAATATGCTACCGACCTCC
Hsd17b7 R	AGCAACGTCCAGATAAAGGG
Lss F	TGTTCGTTGGTCAGTGGATG
Lss R	GATAGCAAATGAAGTGTCCCAG
Msmo1 F	ATTTCCTGCACAGACTCCTTC
Msmo1 R	AGAATCAGGGTTTCCAAGGG
Npy F	AAGCCGGACAATCCGGGCCGAGG
Npy R	GCTTTCCTCATTAAGAGGTCT
Nsdhl F	AGCTGAGGTCGATCATTTGAG
Nsdhl R	AATGTGTTCCTGTGACCTGG
Oxt F	TCACCTACAGCGGATCTCAG
Oxt R	CATATCCAGGTCCAGCACAG
Pfkl F	GGAAAGCCTATCTCATCCAGC
Pfkl R	CCATACCCATCTTGCTACTCAG
Pfkm F	GATGGCTTTGAGGGTCTGG
Pfkm R	CTTGGTTATGTTGGCACTGATC
Pfkp F	CAAATCAAAGAAATCGGCTGGG
Pfkp R	AGAAGGGCATTGATACTATGGG
Pgk1 F	AACCTCCGCTTTCATGTAGAG
Pgk1 R	GACATCTCCTAGTTTGGACAGTG
Pkm2 F	CCATTCTCTACCGTCCTGTTG
Pkm2 R	TCCATGTAAGCGTTGTCCAG
Pomc F	AGACCTCCATAGATGTGTGGA
Pomc R	AGCGGAAGTGACCCATGACGT
Qrfp F	GACTCACCTGCCCTTCTTAG
Qrfp R	CGATGTCACCGATGTCTGTG
Sqle F	TTGTTGCGGATGGACTCTTCTCCA
Sqle R	GTTGACCAGAACAAGCTCCGCAAA
Srebf2 F	GCGTTCTGGAGACCATGGA
Srebf2 R	ACAAAGTTGCTCTGAAAACAAATCA
Srebp1c F	GAGCCATGGAATGCACATTT
Srebp1c R	CTCAGGAGAGTTGGCACCTG
Tbp F	ACCCTTCACCAATGACTCCTATG
Tbp R	TGACTGCAGCAAATCGCTTGG
Tpi1 F	AACTGGAAGATGAACGGGAG
Tpi1 R	GCAATTTTGGGATCCAGCTTC
Trh F	AAAGACCTCCAGCGTGTG
Trh R	CTCCCACTTCTCCCAAATCTC
